# Supplementary material
Source: HighWire-hosted journal article supplement (https://bjsm.bmj.com/content/50/19/1169)
Supplement: inline-supplementary-material-3 [file inline-supplementary-material-3.pdf]

## Conflicts of Interest

---

**DRG** is a Professor in Trauma and Orthopaedic surgery who treats patients with FAI syndrome in the NHS and independent practice. He holds a research grant in the management of FAI syndrome from the National Institute of Health Research. He is a paid consultant for Styker (Europe) who manufacture hip arthroscopy equipment.

**EJD** is an Orthopaedic Registrar and PhD student at the University of Warwick. He conducts research in FAI syndrome.

**JOD** is an Associate Professor in Orthopaedic surgery who treats patients with FAI syndrome in private practice. He holds a research grant in the management of FAI syndrome from the National Health and Medical Research Council (Australia). He is a paid consultant for Smith and Nephew, and Medacta.

**RA** is an Orthopaedic Registrar and conducts research on the epidemiology of FAI syndrome and osteoarthritis.

**TA** is an assistant professor in Orthopaedic surgery. He manages patients with FAI syndrome as part of his routine clinical practice.

**MB** is a Professor of Orthopaedic surgery who treats patients with FAI syndrome. He was one of the original authors to describe FAI syndrome and continues to conduct research in this field.

**JC** is a Professor in Orthopaedic Surgery who treats patients with FAI syndrome. He holds grants from Zimmer and Smith & Nephew, is a Consultant for Microport Orthopedics and receives royalties from Wolters Kluwer Health (publication royalties) and Curing Hip Disease Fund and ANCHOR.

**HPD** is a specialist Sport and Exercise Medicine Physician and Director of Medical Education at ASPETAR, Qatar Orthopaedic and Sports Medicine Hospital.

**EF** is a Consultant Sports and exercise Medicine Physician with a special interest in the non-surgical management of athletic hip and groin pain, working academically and in private practice in Ireland.

**MG** is a Physiotherapist at Southampton Football Club who treats patients with FAI syndrome at the Club (under 8 to 1st team players) and in independent practice. He is involved with a number of research projects exploring imaging, aetiology, diagnosis and treatments of FAI syndrome within elite football and other football populations.

**RSH** is a Professor of physiotherapy. She undertakes research into FAI syndrome.

**PH** is an academic orthopaedic surgeon who conducts research and treats patients with FAI syndrome.

**AK**, MD, FRCPC, is an independent Consultant Musculoskeletal Radiologist who is involved in the care of elite athletes including patients with FAI syndrome. He is a paid consultant for Arthrosurface who manufacture joint resurfacing/restoration devices.

**HDM** is an orthopaedic surgeon who conducts research and treats patients with FAI syndrome. He is a consultant for Smith and Nephew and Pivot Medical.

**RLM** is a Professor of physical therapy and treats patients with FAI syndrome. He has no financial conflicts of interest

**RCM** is an orthopaedic surgeon who conducts research and treats patients with FAI syndrome. He receives financial support from Pivot Medical, Smith & Nephew, Stryker, KNG Health Consulting, Arthroscopy Association of North America, American Academy of Orthopaedic Surgeons, North Carolina Orthopaedic Association, and MD.

**MJP** is an orthopaedic surgeon who treats patients with FAI syndrome in the independent sector. He receives royalties, research support, is a stakeholder or consultant for: Smith and Nephew Endoscopy, Arthrosurface, MJP Innovations LLC, MIS, Ossur, Arthrex, Siemens, Bledsoe, ConMed Linvatec, DonJoy SLACK Inc and Elsevier.

**MPR** is an Associate Professor in Orthopaedic surgery who treats patients with FAI syndrome through Duke University. He holds an internal research grant in the management of FAI syndrome from Duke University Medical Center. He has no outside financial disclosures

**AT** is an associate Professor in physiotherapy involved in physical therapy research in patients with FAI syndrome. He is a sports and musculoskeletal physiotherapist who consults in independent practice treating patients with FAI syndrome.

**KT** is an academic physiotherapist who conducts research and treats patients' with FAI syndrome.

**SW** is a patient with FAI syndrome who has been treated with surgery. She has no financial conflicts of interest to declare.

**AW** is involved in the clinical care of patients with FAI syndrome and research investigating screening for cam and pincer morphology, and hip mobility in asymptomatic athletes.

**KB** is Professor in Physiotherapy who conducts research into the management of FAI syndrome which is funded by the National Health and Medical Research Council.
